# Supplementary material
Source: PubMed Central journal article supplement (PMC7063409)
Supplement: mmc1.pdf [file mmc1.pdf]

**Biophysical Journal, Volume 118**

**Supplemental Information**

**Modulating the Stiffness of the Myosin VI Single  $\alpha$ -Helical Domain**

**C. Ashley Barnes, Yang Shen, Jinfu Ying, and Ad Bax**

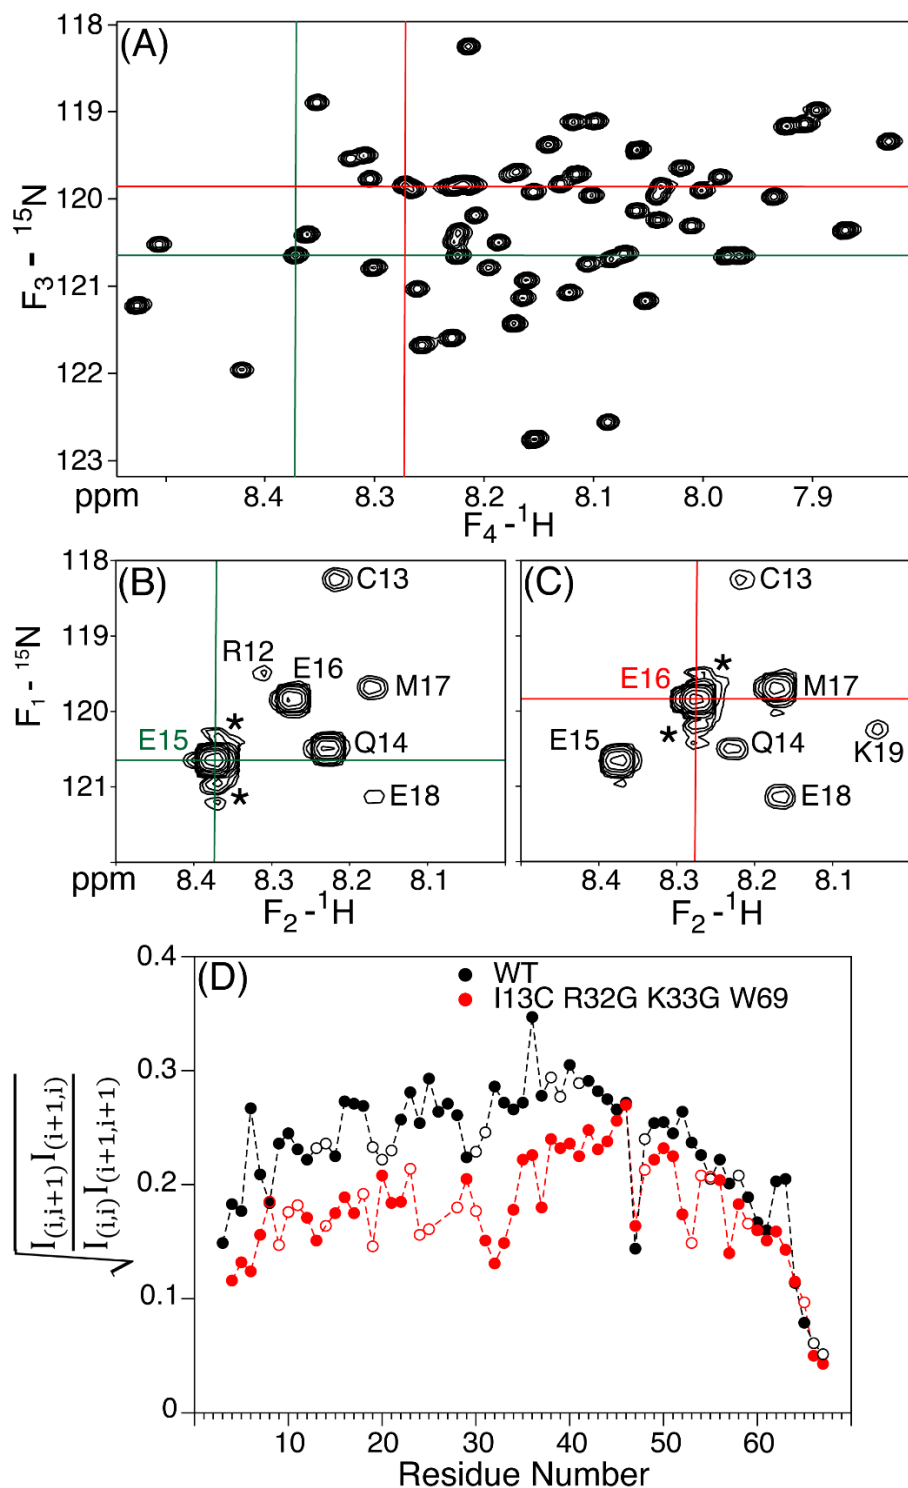

**FIGURE S1** 4D NOESY data of the I13C/R32G/K33G triple mutant of the myosin VI SAH domain. Experimental parameters are included in Table S5. (A) Small region of the projection of the 4D spectrum onto the  $(F_3, F_4)$  TROSY plane, with chemical shift axis calibration adjusted to remove the  ${}^1\text{J}_{\text{NH}}/2$  component, such that it coincides with the  $(F_1, F_2)$  HMQC cross sections shown in (B, C). These HMQC cross sections through the 4D spectrum are orthogonal to the  $(F_3, F_4)$

projection at the positions marked by the green and red cross hairs in (A). Assignments for the diagonal (marked by cross hairs) and cross peaks to adjacent residues are marked by residue numbers. Asterisk mark the truncation artifacts of the intense diagonal resonances. (D) Amide-amide NOE cross peak intensities. Geometric mean of the cross peak over diagonal peak intensity ratios of sequential  $H^N$ - $H^N$  NOE interactions observed in the 250 ms mixing time 4D NOESY spectrum of wild type MT (black) and I13C/R32G/K33G triple mutant (red), as a function of residue number. Both 4D spectra were recorded at 900 MHz  $^1H$  frequency, 20 °C. Values are only shown for well-resolved peaks whose intensities could be accurately measured.  $I_{(i,i)}$  refers to the diagonal intensity of residue  $i$ , and  $I_{(i,i+1)}$  is the sequential cross peak intensity. Experimental uncertainties in the ratios are *ca* 10%; open symbols correspond to interactions where partial overlap of one or both of the diagonal peak made accurate diagonal intensity measurement unreliable. For these cases, diagonal intensity was estimated on the basis of fitting a 4<sup>th</sup> order polynomial function through the intensities of diagonals whose intensity could be measured unambiguously (Figure S2).

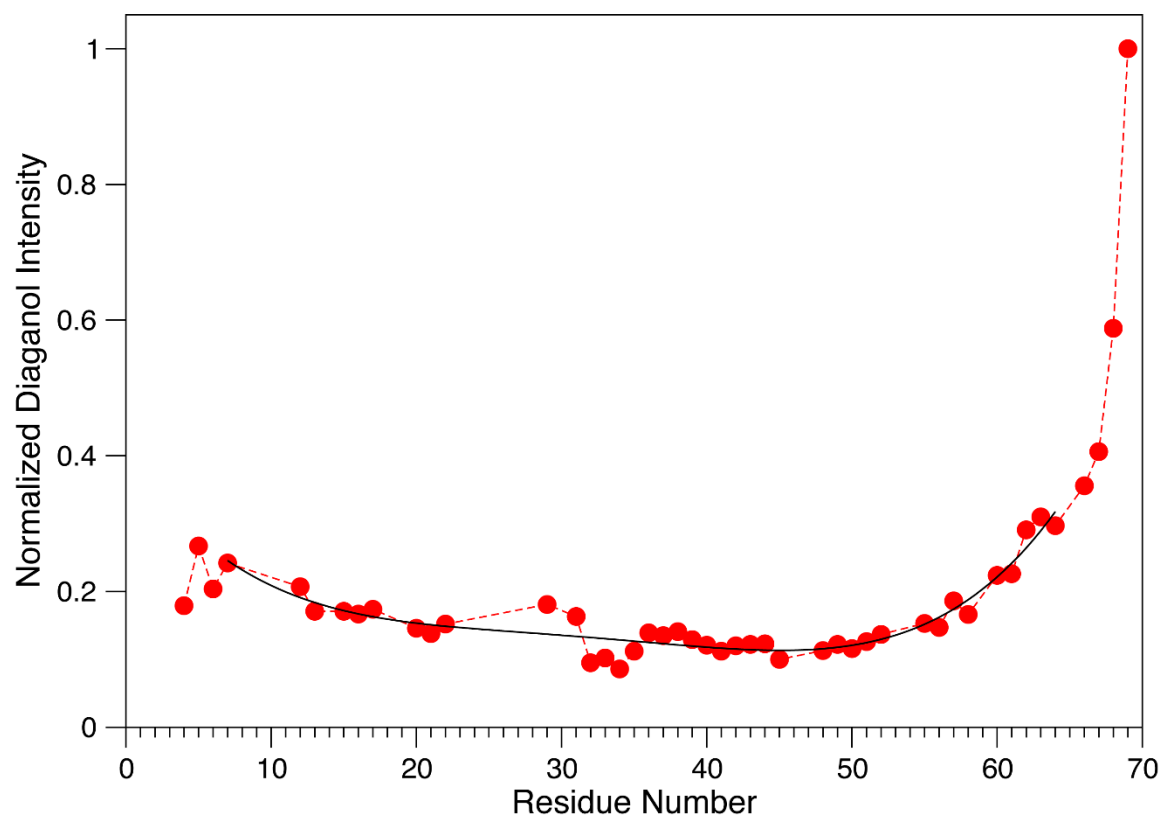

**FIGURE S2** Diagonal intensities as a function of residue number for the backbone amides in the 4D NOESY spectrum of the I13C/R32G/K33G mutant of the myosin VI SAH domain. Intensities are normalized such that the highest diagonal intensity is 1. A best fit of the diagonal intensities of residues A7-K63 to a 4<sup>th</sup> order polynomial is used to estimate diagonal peak intensities that were not fully resolved.

**Table S1.** Chemical shifts of the native and mutant myosin VI SAH domains, measured in 20 mM sodium phosphate, 2 mM EDTA, 2% D<sub>2</sub>O pH=6.3. <sup>1</sup>H and <sup>15</sup>N chemical shifts are at 20 °C. TCEP (1 mM) was added to the I13C samples.

| Res       | WT                   |                       | I13C W69             |                       | I13C R32G W69        |                       | I13C R32G K33G W69   |                       | I13C D27H E28H W69   |                       |
|-----------|----------------------|-----------------------|----------------------|-----------------------|----------------------|-----------------------|----------------------|-----------------------|----------------------|-----------------------|
|           | <sup>1</sup> H (ppm) | <sup>15</sup> N (ppm) |
| Q2        | 8.79                 | 120.01                | 8.80                 | 119.92                | 8.80                 | 119.93                | 8.80                 | 119.94                | 8.80                 | 119.92                |
| Q3        | 8.18                 | 119.71                | 8.16                 | 119.56                | 8.16                 | 119.57                | 8.16                 | 119.60                | 8.16                 | 119.56                |
| E4        | 8.26                 | 121.70                | 8.24                 | 121.59                | 8.24                 | 121.59                | 8.24                 | 121.59                | 8.24                 | 121.59                |
| E5        | 8.54                 | 121.30                | 8.51                 | 121.12                | 8.51                 | 121.13                | 8.51                 | 121.13                | 8.51                 | 121.12                |
| E6        | 8.23                 | 121.78                | 8.22                 | 121.51                | 8.22                 | 121.51                | 8.22                 | 121.51                | 8.22                 | 121.51                |
| A7        | 8.18                 | 121.00                | 8.17                 | 121.36                | 8.17                 | 121.36                | 8.16                 | 121.36                | 8.17                 | 121.37                |
| E8        | 7.89                 | 118.95                | 7.92                 | 119.13                | 7.92                 | 119.12                | 7.92                 | 119.10                | 7.92                 | 119.14                |
| R9        | 8.03                 | 121.40                | 8.05                 | 121.11                | 8.05                 | 121.11                | 8.05                 | 121.10                | 8.06                 | 121.10                |
| L10       | 8.14                 | 118.02                | 8.23                 | 119.79                | 8.22                 | 119.77                | 8.22                 | 119.77                | 8.23                 | 119.79                |
| R11       | 7.99                 | 120.78                | 7.97                 | 120.59                | 7.97                 | 120.59                | 7.97                 | 120.58                | 7.98                 | 120.61                |
| R12       | 8.18                 | 119.49                | 8.32                 | 119.43                | 8.31                 | 119.44                | 8.31                 | 119.43                | 8.32                 | 119.40                |
| I13 (C13) | 7.93                 | 120.12                | (8.22                | 118.22)               | (8.22                | 118.21)               | (8.21                | 118.18)               | 8.21                 | 118.26                |
| Q14       | 8.01                 | 119.92                | 8.24                 | 120.40                | 8.23                 | 120.42                | 8.22                 | 120.43                | 8.24                 | 120.41                |
| E15       | 8.43                 | 120.35                | 8.38                 | 120.63                | 8.38                 | 120.61                | 8.37                 | 120.57                | 8.38                 | 120.67                |
| E16       | 8.30                 | 120.27                | 8.28                 | 119.82                | 8.27                 | 119.81                | 8.27                 | 119.77                | 8.28                 | 119.81                |
| M17       | 8.37                 | 119.82                | 8.15                 | 119.56                | 8.18                 | 119.67                | 8.16                 | 119.59                | 8.16                 | 119.56                |
| E18       | 8.18                 | 121.31                | 8.17                 | 121.18                | 8.17                 | 121.16                | 8.16                 | 121.06                | 8.16                 | 121.17                |
| K19       | 8.07                 | 120.34                | 8.07                 | 120.30                | 8.06                 | 120.21                | 8.04                 | 120.17                | 8.07                 | 120.20                |
| E20       | 8.03                 | 120.00                | 8.02                 | 119.98                | 8.01                 | 119.91                | 8.00                 | 119.82                | 8.03                 | 119.92                |
| R21       | 8.16                 | 121.13                | 8.15                 | 121.12                | 8.15                 | 121.13                | 8.12                 | 121.02                | 8.16                 | 121.07                |
| K22       | 8.16                 | 119.07                | 8.15                 | 119.06                | 8.14                 | 119.00                | 8.12                 | 119.04                | 8.14                 | 119.02                |
| R23       | 7.96                 | 120.06                | 7.96                 | 120.03                | 7.94                 | 119.94                | 7.93                 | 119.90                | 7.99                 | 119.93                |
| R24       | 8.22                 | 119.34                | 8.21                 | 119.32                | 8.18                 | 119.40                | 8.14                 | 119.30                | 8.22                 | 119.69                |
| E25       | 8.25                 | 120.27                | 8.25                 | 120.25                | 8.25                 | 120.04                | 8.21                 | 119.75                | 8.21                 | 120.15                |
| E26       | 8.34                 | 120.49                | 8.34                 | 120.48                | 8.31                 | 120.16                | 8.22                 | 120.30                | 8.29                 | 120.32                |
| D27(H27)  | 8.36                 | 121.07                | 8.36                 | 121.07                | 8.31                 | 120.80                | 8.22                 | 119.76                | (8.21                | 119.08)               |
| E28(H28)  | 8.24                 | 120.37                | 8.24                 | 120.38                | 8.28                 | 120.04                | 8.22                 | 119.77                | (8.32                | 118.94)               |
| Q29       | 8.18                 | 118.99                | 8.18                 | 118.99                | 8.21                 | 119.77                | 8.10                 | 119.04                | 8.42                 | 119.14                |
| R30       | 8.15                 | 121.12                | 8.15                 | 121.10                | 8.14                 | 121.06                | 8.07                 | 120.54                | 8.21                 | 120.95                |
| R31       | 8.18                 | 119.71                | 8.18                 | 119.69                | 8.26                 | 119.68                | 8.22                 | 120.57                | 8.11                 | 119.76                |
| R32(G32)  | 8.20                 | 119.43                | 8.20                 | 119.41                | (8.28                | 107.35)               | (8.40                | 108.49)               | 8.10                 | 119.88                |
| K33(G33)  | 8.03                 | 120.87                | 8.03                 | 120.86                | 7.98                 | 123.03                | (8.31                | 109.36)               | 8.06                 | 120.83                |
| E34       | 8.29                 | 119.59                | 8.29                 | 119.57                | 8.31                 | 119.99                | 8.42                 | 121.89                | 8.31                 | 119.60                |

|     |      |        |      |        |      |        |      |        |      |        |
|-----|------|--------|------|--------|------|--------|------|--------|------|--------|
| E35 | 8.22 | 120.36 | 8.23 | 120.36 | 8.28 | 120.26 | 8.49 | 120.44 | 8.26 | 120.10 |
| E36 | 8.19 | 121.06 | 8.19 | 121.06 | 8.06 | 121.03 | 8.16 | 120.86 | 8.19 | 121.07 |
| E37 | 8.31 | 119.84 | 8.31 | 119.83 | 8.25 | 119.65 | 8.10 | 119.88 | 8.32 | 119.90 |
| R38 | 8.07 | 120.34 | 8.07 | 120.27 | 8.06 | 120.31 | 8.03 | 119.78 | 8.04 | 120.21 |
| R39 | 8.17 | 119.78 | 8.17 | 119.77 | 8.20 | 119.76 | 8.15 | 119.85 | 8.19 | 119.70 |
| M40 | 8.33 | 118.77 | 8.33 | 118.75 | 8.36 | 118.86 | 8.35 | 118.83 | 8.30 | 118.62 |
| K41 | 8.07 | 120.65 | 8.08 | 120.61 | 8.08 | 120.64 | 8.10 | 120.67 | 8.05 | 120.64 |
| L42 | 7.99 | 120.13 | 7.99 | 120.11 | 7.98 | 120.13 | 8.01 | 120.24 | 8.01 | 120.12 |
| E43 | 8.27 | 120.90 | 8.27 | 120.89 | 8.26 | 120.92 | 8.26 | 120.96 | 8.29 | 120.85 |
| M44 | 8.32 | 119.53 | 8.32 | 119.53 | 8.32 | 119.44 | 8.32 | 119.47 | 8.31 | 119.59 |
| E45 | 8.21 | 120.73 | 8.21 | 120.71 | 8.20 | 120.70 | 8.19 | 120.71 | 8.21 | 120.71 |
| A46 | 8.09 | 122.50 | 8.09 | 122.49 | 8.09 | 122.51 | 8.09 | 122.50 | 8.09 | 122.48 |
| K47 | 8.03 | 119.93 | 8.03 | 119.94 | 8.04 | 119.91 | 8.04 | 119.91 | 8.03 | 119.91 |
| R48 | 8.06 | 120.05 | 8.06 | 120.02 | 8.06 | 120.05 | 8.06 | 120.06 | 8.05 | 119.99 |
| K49 | 8.12 | 119.76 | 8.12 | 119.74 | 8.12 | 119.75 | 8.13 | 119.77 | 8.11 | 119.79 |
| Q50 | 7.98 | 119.68 | 7.98 | 119.66 | 7.98 | 119.66 | 7.98 | 119.68 | 7.98 | 119.66 |
| E51 | 8.31 | 119.70 | 8.31 | 119.68 | 8.30 | 119.69 | 8.30 | 119.69 | 8.31 | 119.67 |
| E52 | 8.19 | 120.43 | 8.19 | 120.43 | 8.19 | 120.42 | 8.19 | 120.43 | 8.19 | 120.43 |
| E53 | 8.21 | 120.13 | 8.21 | 120.13 | 8.21 | 120.13 | 8.21 | 120.12 | 8.20 | 120.18 |
| E54 | 8.26 | 119.83 | 8.27 | 119.83 | 8.27 | 119.83 | 8.27 | 119.83 | 8.27 | 119.84 |
| R55 | 8.07 | 120.59 | 8.08 | 120.62 | 8.08 | 120.64 | 8.08 | 120.62 | 8.08 | 120.61 |
| K56 | 8.01 | 119.58 | 8.02 | 119.59 | 8.02 | 119.59 | 8.02 | 119.58 | 8.02 | 119.60 |
| K57 | 7.83 | 119.30 | 7.83 | 119.27 | 7.83 | 119.26 | 7.83 | 119.26 | 7.83 | 119.29 |
| R58 | 7.89 | 118.95 | 7.89 | 118.90 | 7.89 | 118.89 | 7.89 | 118.89 | 7.90 | 118.92 |
| E59 | 8.22 | 119.78 | 8.22 | 119.79 | 8.22 | 119.78 | 8.22 | 119.76 | 8.23 | 119.80 |
| D60 | 8.35 | 120.28 | 8.37 | 120.34 | 8.37 | 120.34 | 8.36 | 120.34 | 8.37 | 120.34 |
| D61 | 8.28 | 120.62 | 8.30 | 120.71 | 8.30 | 120.72 | 8.30 | 120.72 | 8.30 | 120.71 |
| E62 | 8.10 | 119.64 | 8.11 | 119.63 | 8.11 | 119.63 | 8.11 | 119.63 | 8.11 | 119.65 |
| K63 | 7.90 | 119.18 | 7.91 | 119.08 | 7.90 | 119.07 | 7.90 | 119.07 | 7.91 | 119.09 |
| R64 | 7.89 | 120.44 | 7.87 | 120.30 | 7.87 | 120.30 | 7.87 | 120.29 | 7.87 | 120.30 |
| I65 | 8.02 | 120.95 | 7.98 | 120.59 | 7.97 | 120.59 | 7.97 | 120.58 | 7.98 | 120.61 |
| Q66 | 8.28 | 123.61 | 8.15 | 122.70 | 8.15 | 122.70 | 8.15 | 122.69 | 8.16 | 122.70 |
| A67 | 8.23 | 125.85 | 8.09 | 124.45 | 8.09 | 124.46 | 8.09 | 124.45 | 8.09 | 124.45 |
| E68 | 7.95 | 125.34 | 8.06 | 119.37 | 8.06 | 119.37 | 8.06 | 119.37 | 8.06 | 119.37 |
| W69 |      |        | 7.62 | 126.25 | 7.62 | 126.25 | 7.62 | 126.25 | 7.62 | 126.25 |

**Table S2.** TROSY  $^{15}\text{N}$  transverse relaxation rates ( $R_{2,\text{TR}}$ ) of the  $\Psi$ -WT and mutant myosin-VI SAH domains in 20 mM sodium phosphate, 2 mM EDTA, 1 mM TCEP, 2%  $\text{D}_2\text{O}$  pH=6.3, 20 °C, measured at 900 MHz  $^1\text{H}$  frequency.  $R_{2,\text{TR}}$  are in inverse seconds and were determined from fitting  $^{15}\text{N}$  Hahn-echo decays.

|          | <b>WT</b>         | <b>I13C/W69</b>   | <b>I13C/R32G<br/>W69</b> | <b>I13C/R32G<br/>K33G/W69</b> |
|----------|-------------------|-------------------|--------------------------|-------------------------------|
|          | $R_{2,\text{TR}}$ | $R_{2,\text{TR}}$ | $R_{2,\text{TR}}$        | $R_{2,\text{TR}}$             |
| E4       | 4.6               | 3.6               | 3.7                      | 3.1                           |
| E5       | 4.6               | 3.9               | 3.7                      | 3.1                           |
| E6       | 4.6               | 3.9               | 3.9                      | 3.1                           |
| A7       | 5.0               | 4.5               | 4.2                      | 3.6                           |
| E8       |                   | 4.1               | 3.8                      | 3.2                           |
| R9       | 4.5               | 4.1               | 4.0                      | 3.2                           |
| L10      | 4.6               |                   |                          |                               |
| R11      | 4.6               |                   |                          |                               |
| R12      | 4.8               | 4.6               | 4.3                      | 3.4                           |
| I13(C13) | 4.5               | (4.9)             | (4.5)                    | (3.6)                         |
| Q14      | 4.8               | 4.6               | 4.5                      | 3.6                           |
| E15      | 4.8               | 4.6               | 4.4                      | 3.5                           |
| E16      | 4.9               | 4.9               | 4.5                      | 3.6                           |
| M17      | 4.9               |                   | 4.4                      |                               |
| E18      | 4.9               | 4.8               | 4.4                      | 3.4                           |
| K19      |                   | 5.2               | 4.8                      | 3.4                           |
| E20      | 4.9               | 4.9               | 4.7                      | 3.6                           |
| R21      |                   |                   | 4.5                      | 3.5                           |
| K22      | 5.0               | 4.9               | 4.6                      | 3.8                           |
| R23      | 5.1               | 5.1               | 4.6                      | 3.7                           |
| R24      | 5.3               | 5.4               | 4.7                      | 3.9                           |
| E25      | 5.2               | 5.1               | 4.9                      |                               |
| E26      | 5.3               |                   | 4.8                      |                               |
| D27      | 5.4               | 5.3               | 4.9                      | 3.7                           |
| E28      | 5.3               | 5.4               | 4.8                      |                               |
| Q29      | 5.3               | 5.2               |                          | 3.7                           |
| R30      |                   |                   | 4.9                      | 3.6                           |
| R31      | 5.5               | 5.0               |                          | 3.7                           |
| R32(G32) | 5.4               | 5.2               | (5.5)                    | (4.2)                         |
| K33(G33) | 5.2               | 5.0               | 5.1                      | (3.7)                         |
| E34      | 5.5               | 5.2               | 5.3                      | 4.0                           |
| E35      | 5.3               | 5.2               | 5.2                      | 3.9                           |
| E36      | 5.2               | 5.3               | 4.8                      | 3.9                           |
| E37      | 5.3               | 5.2               | 5.0                      | 3.9                           |
| R38      |                   | 5.0               | 5.1                      | 4.1                           |
| R39      |                   | 5.5               | 5.0                      | 4.1                           |

|     |     |     |     |     |
|-----|-----|-----|-----|-----|
| M40 | 5.3 | 5.1 | 4.9 | 3.9 |
| K41 |     |     |     | 4.0 |
| L42 | 5.4 | 5.3 | 5.0 | 4.1 |
| E43 | 5.3 | 5.3 | 5.0 | 3.9 |
| M44 | 5.4 | 5.2 | 5.0 | 4.1 |
| E45 | 5.1 | 5.0 | 4.9 | 4.0 |
| A46 | 5.4 | 5.1 | 5.2 | 4.4 |
| K47 | 5.0 | 5.1 | 4.9 | 4.1 |
| R48 | 5.1 | 5.0 | 4.9 | 4.1 |
| K49 | 5.1 | 4.9 | 4.9 | 3.8 |
| E50 | 5.0 | 4.7 | 4.6 | 4.0 |
| E51 | 5.0 | 5.1 | 4.9 | 4.0 |
| E52 | 4.8 | 4.9 | 4.6 | 4.0 |
| E53 | 4.8 | 4.8 | 4.5 | 4.0 |
| E54 | 4.9 | 4.7 | 4.6 | 4.1 |
| R55 |     |     |     | 3.9 |
| K56 | 4.6 | 4.5 | 4.5 | 3.8 |
| K57 | 4.6 | 4.6 | 4.5 | 3.9 |
| R58 |     | 4.6 | 4.7 | 3.9 |
| E59 | 4.5 | 4.3 | 4.3 |     |
| D60 | 3.9 | 3.9 | 4.0 | 3.3 |
| D61 | 3.8 | 3.6 | 3.7 | 3.3 |
| E62 | 3.6 | 3.4 | 3.5 | 3.0 |
| K63 |     | 3.5 | 3.5 | 3.1 |
| R64 | 3.3 | 2.9 | 2.9 | 2.7 |
| I65 | 2.7 |     | 2.8 |     |
| Q66 | 3.1 | 2.9 | 2.9 | 2.7 |
| A67 | 3.1 | 2.4 | 2.5 | 2.4 |

**Table S3.** Hydrogen exchange rates ( $s^{-1}$ ) of the pseudo WT (E68W), I13C E68W, I13C R32G W69, and I13C R32G K33G W69 MT domains in 20 mM sodium phosphate, 2 mM EDTA, 1 mM TCEP, 2% D<sub>2</sub>O at 20 °C and 30 °C.

| Residue  | <b>E68W</b> | <b>I13C/W68</b> | <b>I13C/R32G/W69</b> |                      | <b>I13C/R32G/K33G/W69</b> |                      |
|----------|-------------|-----------------|----------------------|----------------------|---------------------------|----------------------|
|          | 20 °C       | 20 °C           | 20 °C                | 30 °C                | 20 °C                     | 30 °C                |
|          | pH 7.50     | pH 7.18         | pH 7.51              | pH 7.51 <sup>a</sup> | pH 7.37                   | pH 7.37 <sup>a</sup> |
| E4       | 17          | 8.7             | 18                   | 50                   | 14                        | 38                   |
| E5       | 7.5         | 3.8             | 8.1                  | 22                   | 5.9                       | 17                   |
| E6       | 6.7         | 3.3             | 6.8                  | 21                   | 5.4                       | 17                   |
| A7       | 3.0         | 1.7             | 3.6                  | 12                   | 2.7                       | 9.3                  |
| E8       |             | 1.0             | 2.2                  | 8.5                  | 1.7                       | 6.5                  |
| R9       | 0.96        | 0.71            | 1.6                  | 7.2                  | 1.2                       | 5.6                  |
| L10      | 0.59        |                 |                      |                      |                           |                      |
| R11      | 0.60        | 0.73            | 1.9                  | 7.6                  | 1.4                       | 5.9                  |
| R12      | 0.75        | 1.5             | 2.2                  | 17                   | 2.8                       | 14                   |
| C13      | 0.49        | 3.3             | 7.2                  | 33                   | 5.5                       | 25                   |
| Q14      | 0.59        | 4.1             | 9.5                  |                      | 7.1                       |                      |
| E15      | 0.57        | 1.6             | 3.1                  | 11                   | 2.4                       | 8.7                  |
| E16      | 0.53        | 0.75            | 1.5                  | 5.4                  | 1.2                       | 4.7                  |
| M17      | 0.55        |                 | 1.4                  |                      | 1.1                       | 5.1                  |
| E18      | 0.78        | 0.85            | 1.8                  | 7.8                  | 1.6                       | 6.8                  |
| K19      |             | 0.46            | 1.2                  | 4.1                  | 1.1                       | 5.7                  |
| E20      | 0.67        | 0.45            | 1.0                  | 4.7                  | 1.1                       | 5.5                  |
| R21      |             | 0.41            | 1.9                  | 6.4                  | 1.6                       | 8.1                  |
| K22      | 0.84        | 0.48            | 1.6                  | 8.4                  | 2.4                       | 12                   |
| R23      | 0.84        | 0.51            | 1.5                  | 8.6                  | 2.3                       | 12                   |
| R24      | 1.1         | 0.68            | 2.1                  | 6.0                  | 2.9                       | 15                   |
| E25      | 1.0         | 0.62            | 1.7                  | 7.8                  |                           | 3.7                  |
| E26      | 0.85        | 0.44            | 1.2                  | 8.8                  |                           | 5.4                  |
| D27      | 1.0         | 0.49            | 1.7                  | 5.0                  | 1.8                       | 5.7                  |
| E28      | 0.82        | 0.42            | 1.6                  |                      |                           | 6.4                  |
| Q29      | 0.77        | 0.38            | 1.5                  | 3.2                  | 3.4                       | 12                   |
| R30      |             | 0.36            | 2.4                  | 3.9                  | 4.6                       | 19                   |
| R31      | 0.74        |                 | 3.7                  | 15                   | 11                        | 34                   |
| R32(G32) | 0.77        | 0.37            | (10)                 | (34)                 | (21)                      | (50)                 |
| K33(G33) | 0.86        | 0.45            | 7.8                  | 32                   | (17)                      | (50)                 |
| E34      | 0.63        | 0.26            | 4.2                  | 12                   | 17                        | 50                   |
| E35      | 0.49        | 0.27            | 2.3                  | 6.8                  | 8.5                       | 24                   |
| E36      | 0.36        | 0.16            | 1.1                  |                      | 2.7                       | 8.2                  |
| E37      | 0.34        | 0.15            | 1.1                  |                      | 1.6                       | 5.6                  |
| R38      |             | 0.20            | 0.9                  |                      | 1.7                       | 7.3                  |
| R39      | 0.56        | 0.36            | 1.5                  | 5.0                  | 1.8                       | 8.0                  |
| M40      | 0.72        | 0.37            | 1.0                  | 5.7                  | 1.9                       | 9.2                  |
| K41      |             |                 | 1.2                  | 6.3                  | 1.8                       | 9.2                  |
| L42      | 0.72        | 0.35            | 0.74                 | 3.5                  | 1.0                       | 4.5                  |



|          |        |        |      |      |       |      |
|----------|--------|--------|------|------|-------|------|
| E43      | 0.90   | 0.37   | 0.96 | 4.6  | 1.1   | 5.3  |
| M44      | 1.1    | 0.63   | 1.8  | 6.3  | 1.5   | 6.8  |
| E45      | 1.2    | 0.53   | 1.1  | 5.3  | 1.2   | 5.7  |
| A46      | 1.3    | 0.52   | 1.2  | 6.0  | 1.2   | 5.9  |
| K47      | 1.4    | 0.58   | 1.3  | 6.2  | 1.2   | 5.6  |
| R48      | 1.4    | 0.69   | 1.2  | 5.9  | 1.1   | 5.8  |
| K49      | 2.0    | 1.0    | 2.0  | 9.6  | 1.6   | 8.0  |
| Q50      | 2.3    | 1.1    | 2.3  |      | 1.8   | 8.5  |
| E51      | 1.4    | 0.69   | 1.4  | 6.3  | 1.0   | 4.9  |
| E52      | 1.0    | 0.45   | 0.86 | 3.8  | 0.63  | 5.1  |
| E53      | 0.86   | 0.38   | 0.67 | 3.0  | 0.51  | 2.3  |
| E54      | 1.0    | 0.47   | 0.94 | 5.1  | 0.72  | 3.2  |
| R55      |        | 0.80   | 1.2  | 6.4  | 1.1   | 5.3  |
| K56      | 2.3    | 1.1    | 2.2  | 10   | 1.6   | 8.0  |
| K57      | 2.9    | 1.3    | 2.7  | 11   | 1.9   | 8.4  |
| R58      |        | 2.2    | 4.4  | 21   | 3.2   | 14   |
| E59      | 6.2    |        |      |      |       |      |
| D60      | 4.0    | 2.0    | 3.5  | 13   | 2.7   | 9.7  |
| D61      | 3.4    | 1.7    | 2.9  | 10   | 2.2   | 8.0  |
| E62      | 3.4    | 1.5    | 2.8  | 8.5  | 2.1   | 6.6  |
| K63      |        | 2.3    | 3.7  | 12   | 2.8   | 9.1  |
| R64      | 11     | 5.1    | 9.5  | 31   | 6.7   | 21   |
| I65      | 6.7    | 3.2    | 4.2  | 15   | 2.9   | 11   |
| Q66      | 20     | 10     | 14   | 50   | 11    | 33   |
| A67      | 26     | 14     | 19   | 49   | 14    | 33   |
| E68(W68) | (0.22) | (0.09) | 9.5  | 25   | 7.2   | 19   |
| W69      |        |        | 0.14 | 0.33 | 0.098 | 0.23 |

<sup>a</sup> These pH values were measured at 20 °C and do not include the small decrease in the pH of the solution when the sample temperature is raised to 30 °C.

**Table S4.**  $^1D_{NH}$  RDCs measured at 20 °C, 900 MHz, for the W69 I13C-DOTA-M8-Tm tagged variants of the myosin VI SAH domain in 20 mM sodium phosphate, 2 mM EDTA, 2% D<sub>2</sub>O pH 5.5, 6.3, and 7.5.

| Res      | WT                     | R32G                   | R32G K33G              | D27H E28H              | D27H E28H              |
|----------|------------------------|------------------------|------------------------|------------------------|------------------------|
|          | $^1D_{NH}^{20C,pH6.3}$ | $^1D_{NH}^{20C,pH6.3}$ | $^1D_{NH}^{20C,pH6.3}$ | $^1D_{NH}^{20C,pH5.5}$ | $^1D_{NH}^{20C,pH7.5}$ |
| E4       | 11.6                   | 11.8                   | 13.1                   | 10.0                   | 11.1                   |
| E5       | 22.1                   | 22.0                   | 22.5                   | 20.7                   |                        |
| E6       | 9.7                    | 11.8                   | 10.1                   | 7.7                    | 9.7                    |
| R24      | 26.1                   | 26.5                   | 24.2                   | 20.3                   | 23.2                   |
| E25      | 30.6                   | 29.2                   | 27.5                   | 23.9                   | 25.6                   |
| E26      | 14.9                   | 15.6                   | 14.6                   | 7.7                    | 12.8                   |
| D27(H27) | 16.9                   | 19.6                   | 12.8                   | (9.4)                  | (13.9)                 |
| E28(H28) | 27.7                   | 26.1                   | 26.3                   | (18.3)                 | (21.7)                 |
| Q29      | 21.2                   | 18.0                   | 15.6                   | 11.4                   | 16.8                   |
| R30      | 12.3                   | 10.7                   | 6.8                    | 4.7                    | 7.9                    |
| R31      | 20.8                   | 14.9                   | 11.4                   | 9.5                    |                        |
| R32(G32) | 28.4                   | (20.4)                 | (10.7)                 | 14.1                   | 21.1                   |
| K33(G33) | 15.1                   | 13.0                   | (3.6)                  | 7.4                    | 12.0                   |
| E34      | 13.8                   | 11.3                   | 4.4                    | 5.8                    | 9.1                    |
| E35      | 24.1                   | 20.5                   | 7.7                    | 12.3                   | 18.4                   |
| E36      | 23.1                   | 19.5                   | 7.1                    | 11.8                   | 18.0                   |
| E37      | 13.0                   | 10.4                   | 3.8                    | 5.4                    | 9.8                    |
| R38      | 14.4                   | 11.4                   | 4.6                    | 5.9                    | 10.8                   |
| R39      | 23.9                   | 19.1                   | 7.4                    | 13.1                   | 17.5                   |
| M40      | 18.4                   | 15.1                   | 5.3                    | 8.5                    | 13.7                   |
| K41      | 10.6                   | 8.2                    | 3.1                    | 2.8                    | 6.5                    |
| L42      | 18.1                   | 14.7                   | 5.5                    | 7.7                    | 13.0                   |
| E43      | 22.3                   | 17.3                   | 7.1                    | 11.7                   | 17.7                   |
| M44      | 12.4                   | 9.6                    | 3.4                    | 4.9                    | 7.5                    |
| E45      | 10.4                   | 7.7                    | 2.4                    | 3.8                    | 6.7                    |
| A46      | 20.3                   | 15.9                   | 5.9                    | 9.7                    | 15.6                   |
| K47      | 18.4                   | 13.4                   | 5.2                    | 8.1                    | 13.3                   |
| R48      | 9.0                    | 8.2                    | 2.7                    | 3.5                    | 5.9                    |
| K49      | 13.2                   | 9.9                    | 3.2                    | 5.2                    | 9.2                    |
| Q50      | 20.9                   | 15.6                   | 6.0                    |                        | 14.9                   |
| E51      | 13.1                   | 10.9                   | 3.4                    | 5.8                    | 9.2                    |
| E52      | 8.0                    | 6.8                    | 1.6                    | 2.0                    | 4.8                    |
| E53      | 15.5                   | 12.5                   | 4.2                    | 7.3                    | 10.3                   |
| E54      | 15.4                   | 13.5                   | 4.7                    | 7.9                    | 13.7                   |
| R55      | 8.5                    | 6.6                    | 2.0                    | 3.3                    | 5.1                    |
| K56      | 8.6                    | 6.8                    | 1.6                    | 6.2                    | 5.8                    |
| K57      | 16.6                   | 13.6                   | 4.0                    | 7.6                    | 12.3                   |
| R58      | 11.6                   | 9.5                    | 2.5                    | 5.3                    | 8.8                    |
| E59      | 5.4                    | 3.9                    | 0.6                    | 1.7                    | 2.8                    |
| D60      | 8.1                    | 6.5                    | 1.6                    | 3.4                    | 6.0                    |
| D61      | 12.6                   | 10.1                   | 2.4                    | 5.7                    | 9.2                    |

|     |       |       |        |      |      |
|-----|-------|-------|--------|------|------|
| E62 | 5.2   | 4.4   | 0.9    | 1.8  | 3.4  |
| K63 | 2.4   | 2.6   | 0.3    | 0.5  | 1.6  |
| R64 | 7.9   | 6.4   | 1.6    | 3.8  | 6.2  |
| I65 | 2.6   | 3.4   | 0.5    | 2.0  | 3.3  |
| Q66 | -0.3  | -0.2  | -0.6   | -0.6 | -0.4 |
| A67 | 0.2   | 0.2   | -0.6   | -0.2 | -0.1 |
| E68 | 2.2   | 1.7   | 0.4    | 1.3  | 1.7  |
| W69 | -0.02 | 0.008 | -0.006 | -0.2 | 0.7  |

**Table S5.** Relevant acquisition parameters for the recording of various spectra used in the study of WT and the various mutants of the myosin VI SAH domain.

| Exp.                     | <sup>15</sup> N, t <sub>1</sub> | <sup>1</sup> H, t <sub>2</sub> | <sup>15</sup> N, t <sub>3</sub> | <sup>1</sup> H, t <sub>4</sub> | Sparsity          | Mixing | Time              | Recycle Delay | NS | <sup>15</sup> N, F <sub>1</sub> | <sup>1</sup> H, F <sub>2</sub> | <sup>15</sup> N, F <sub>3</sub> | <sup>1</sup> H, F <sub>4</sub> |
|--------------------------|---------------------------------|--------------------------------|---------------------------------|--------------------------------|-------------------|--------|-------------------|---------------|----|---------------------------------|--------------------------------|---------------------------------|--------------------------------|
|                          | ms                              |                                |                                 |                                |                   | ms     | hours             | s             |    | Hz/point                        |                                |                                 |                                |
| 4D NOESY                 | 30.7                            | 24.5                           | 60.8                            | 162.2                          | 2.1% <sup>a</sup> | 250    | 42.5 <sup>a</sup> | 3.5           | 4  | 3.2                             | 3.1                            | 7.1                             | 13.4                           |
| ARTSY                    | 175.4                           | 131.3                          |                                 |                                |                   |        | 3.6               | 3             | 4  | 0.7                             | 1.1                            |                                 |                                |
| TROSY-HSQC               | 109.6                           | 85.2                           |                                 |                                |                   |        | 0.8               | 2             | 4  | 1.4                             | 2.2                            |                                 |                                |
| WEX-III TROSY            | 109.6                           | 121.7                          |                                 |                                |                   |        | 8.0               | 6             | 4  | 0.2                             | 0.4                            |                                 |                                |
| <sup>15</sup> N-TROSY R2 | 172.8                           | 131.1                          |                                 |                                |                   |        | 19.0              | 3             | 8  | 0.2                             | 0.4                            |                                 |                                |

<sup>a</sup> Sparsity used for the 4D NOESY data of the I13C/R32G/K33G triple mutant of the myosin VI SAH domain. Sparsity of *ca* 1% and correspondingly shorter total measurement time were used for the other constructs.
